# Supplementary material for: Sorption of cesium on Tamusu clay in synthetic groundwater with high ionic strength
Source: publisher site journal article supplement (doi:10.1515/ract-2019-3161), 2019-07-25
Supplement: Supplementary file 1 [file ract-2019-3161_suppl.docx]

Fig. S1 FT-IR of Cs sorption: *T*=298 K, pH=7.83, *C*0 (Cs) =1.0 mg/L, *m/*V=50 g/L, t=2d in synthetic groundwater.





Fig. S2 XRD of Cs sorption: *T*=298 K, pH=7.83, *C*0 (Cs) =1.0 mg/L, *m/*V=50 g/L, t=2d in synthetic groundwater.

**

**

Fig. S3 The thermodynamic study in synthetic groundwater.

**

**

Fig. S4 The thermodynamic study in deionized water.





Fig. S5 XRD of Cs-loaded clay rock in the presence of HA.

a b


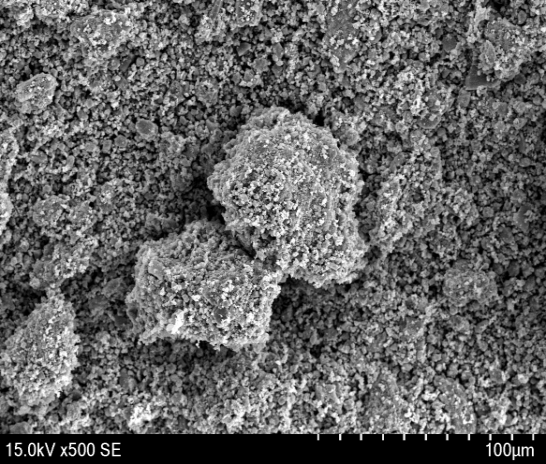

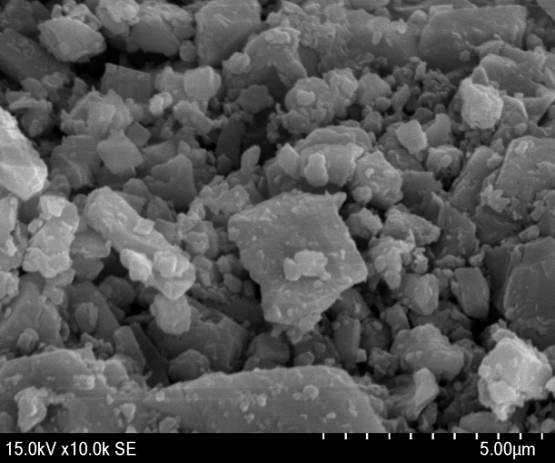


c d


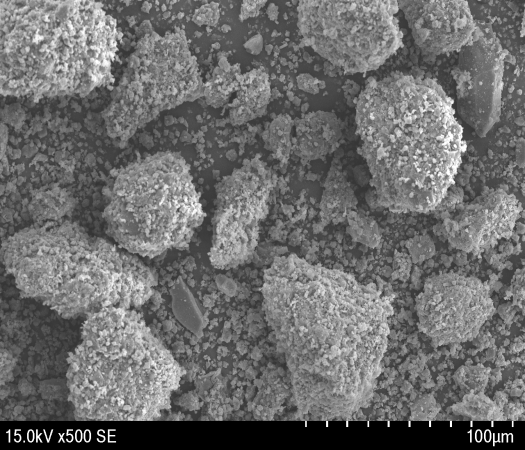

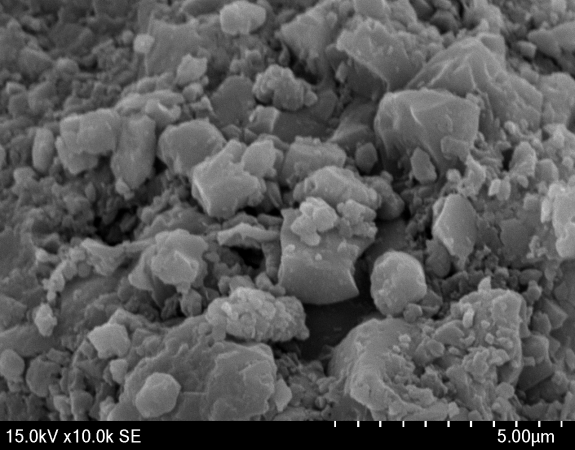


e f


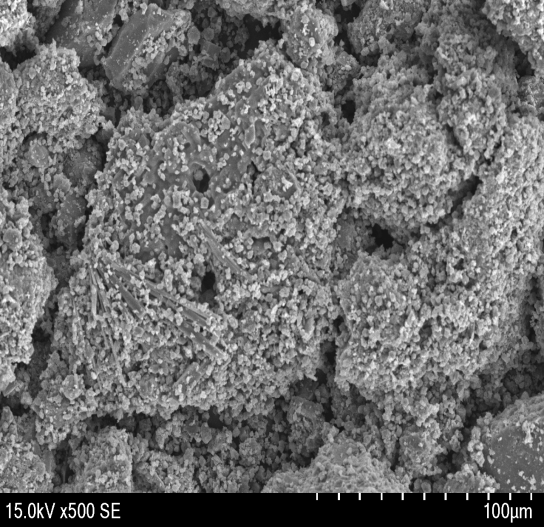

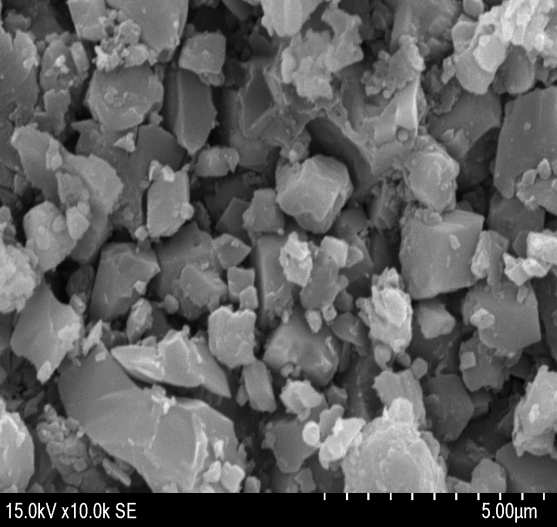


Fig. S6 SEM images of Tamusu clay a, b) original clay c, d) HA=10mg/L in deionized water e,f) HA=10mg/L in synthetic groundwater.





Fig. S7 Effect of solid-to-liquid on the Cs sorption on clay rock.

a b


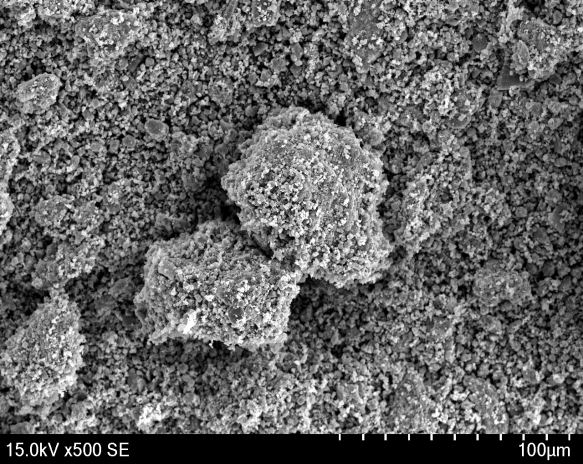

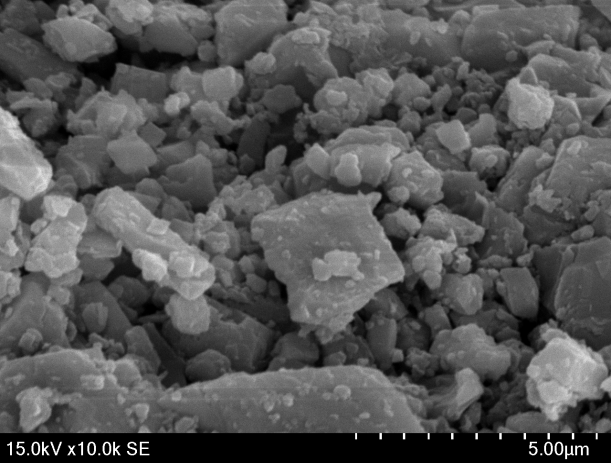


c d


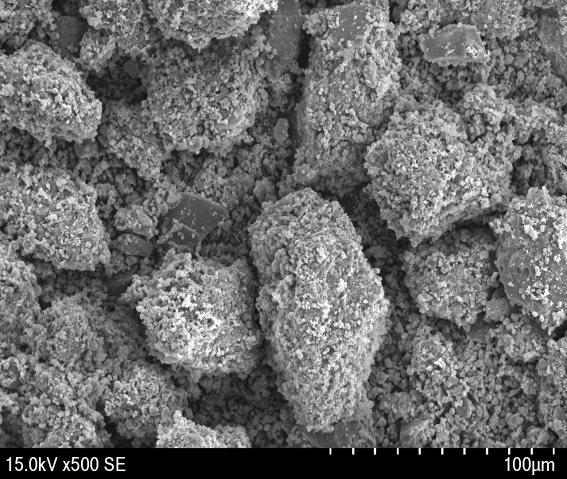

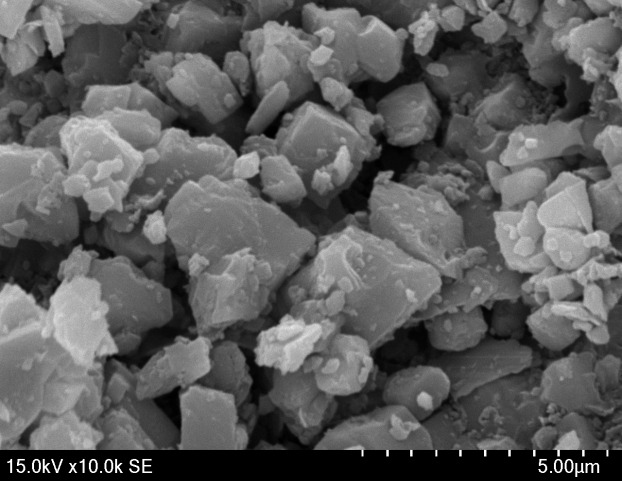


e f

e
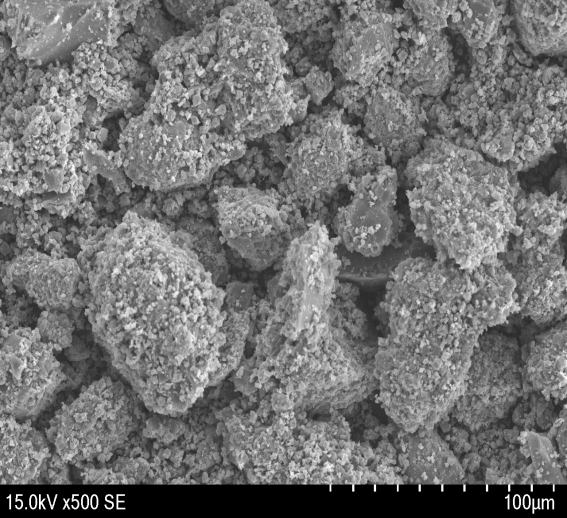

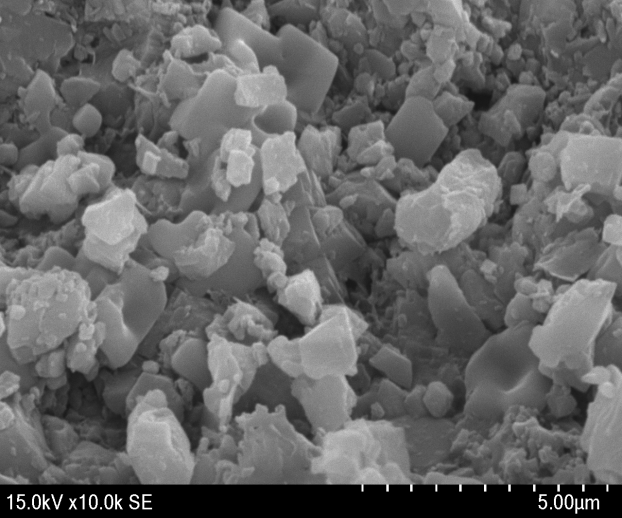


Fig. S8 SEM images of Tamusu clay a, b) original clay c, d) T=328K in deionized water e,f) T=328K in synthetic groundwater.





Fig. S9 XRD of Cs-loaded clay when temperature is 328K.

Table S1 The main ion species and concentrations after the contact with deionized water (*T*=298 K, pH=7.83, *C*0 (Cs) =1.0 mg/L, *t*=2 d, *m/*V=50 g/L, and *V*=10 mL).

| Ionic species | Cl- | SO42- | Na+ | Ca2+ | Mg2+ | K+ | pH |
| --- | --- | --- | --- | --- | --- | --- | --- |
| Ion concentration after  sorption (mg/L) | 30.9 | 289 | 34.7 | 81.2 | 25.8 | 12.9 | 7.98 |
| Groundwater(mg/L) | 13300 | 7600 | 10590 | 770 | 419 | 35.6 | 7.83 |
